# Supplementary material for: Monkeypox treatment with tecovirimat in the Central African Republic under an Expanded Access Programme
Source: bioRxiv or medRxiv preprint supplement (doi:10.1101/2022.08.24.22279177), 2022-08-26

**Fig S1 – number of adult and paediatric patients reporting symptoms at baseline and any time post-baseline**

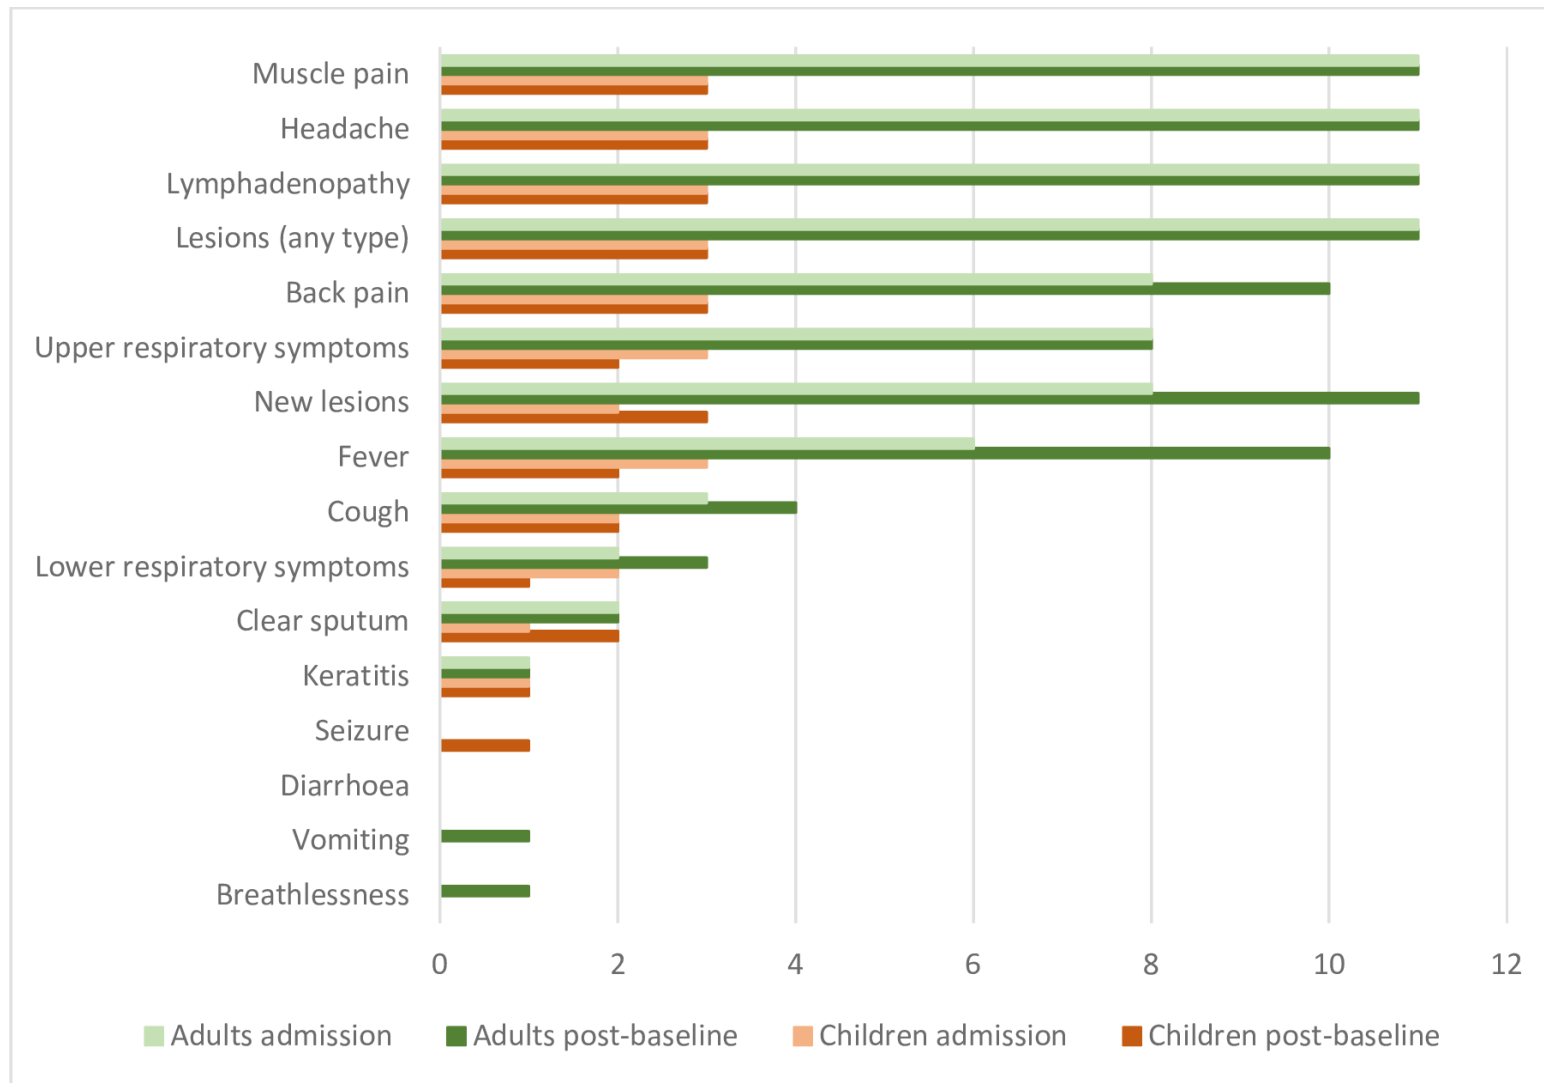

**Table S2 – Virological outcomes using G2R-G real-time PCR assay**

|                    | N patients tested | Results          | CT values |     |     |     |
|--------------------|-------------------|------------------|-----------|-----|-----|-----|
|                    |                   | Positive n (%)   | Mean      | Std | Min | Max |
| <b>Baseline</b>    |                   |                  |           |     |     |     |
| <b>Overall</b>     | <b>14</b>         | <b>14 (100%)</b> |           |     |     |     |
| Blood              | 14                | 12 (86%)         | 32        | 6   | 20  | 41  |
| Active lesion      | 5                 | 5 (100%)         | 28        | 9   | 18  | 39  |
| Crust              | 1                 | 1 (100%)         |           |     |     |     |
| <b>Day 4</b>       |                   |                  |           |     |     |     |
| <b>Overall</b>     | <b>14</b>         | <b>7 (50%)</b>   |           |     |     |     |
| Blood              | 13                | 6 (46%)          | 38        | 1   | 36  | 39  |
| Active lesion      | 2                 | 2 (100%)         | 17        | 2   | 16  | 19  |
| Crust              | 1                 | 1 (100%)         |           |     |     |     |
| <b>Day 8</b>       |                   |                  |           |     |     |     |
| <b>Overall</b>     | <b>10</b>         | <b>1 (10%)</b>   |           |     |     |     |
| Blood              | 10                | 1 (10%)          |           |     |     |     |
| Active lesion      | 0                 | 0 (0%)           |           |     |     |     |
| Crust              | 0                 | 0 (0%)           |           |     |     |     |
| <b>Day 14</b>      |                   |                  |           |     |     |     |
| <b>Overall</b>     | <b>8</b>          | <b>1 (13%)</b>   |           |     |     |     |
| Blood              | 8                 | 1 (13%)          |           |     |     |     |
| Active lesion      | 1                 | 1 (100%)         |           |     |     |     |
| Crust              | 1                 | 1 (100%)         |           |     |     |     |
| <b>Day 21</b>      |                   |                  |           |     |     |     |
| <b>Overall</b>     | <b>2</b>          | <b>1 (50%)</b>   |           |     |     |     |
| Blood              | 2                 | 1 (50%)          |           |     |     |     |
| Active lesion      | 0                 | 0 (0%)           |           |     |     |     |
| Crust              | 1                 | 1 (100%)         |           |     |     |     |
| <b>Final visit</b> |                   |                  |           |     |     |     |
| <b>Overall</b>     | <b>13</b>         | <b>1 (8%)</b>    |           |     |     |     |
| Blood              | 13                | 1 (8%)           |           |     |     |     |
| Active lesion      | 1                 | 1 (100%)         |           |     |     |     |
| Crust              | 0                 | 0 (0%)           |           |     |     |     |

**Table S3 – Virological outcomes using C3L real-time PCR assay**

|                    | N patients tested | Result          | CT values |     |     |     |
|--------------------|-------------------|-----------------|-----------|-----|-----|-----|
|                    |                   | Positive n (%)  | Mean      | Std | Min | Max |
| <b>Baseline</b>    |                   |                 |           |     |     |     |
| <b>Overall</b>     | <b>14</b>         | <b>12 (86%)</b> |           |     |     |     |
| Blood              | 14                | 10 (71%)        | 30        | 5   | 21  | 39  |
| Active lesion      | 5                 | 5 (100%)        | 30        | 9   | 20  | 41  |
| Crust              | 1                 | 1 (100%)        |           |     |     |     |
| <b>Day 4</b>       |                   |                 |           |     |     |     |
| <b>Overall</b>     | <b>14</b>         | <b>5 (36%)</b>  |           |     |     |     |
| Blood              | 13                | 4 (31%)         | 38        | 1   | 36  | 40  |
| Active lesion      | 2                 | 2 (100%)        | 16        | 1   | 15  | 17  |
| Crust              | 1                 | 1 (100%)        |           |     |     |     |
| <b>Day 8</b>       |                   |                 |           |     |     |     |
| <b>Overall</b>     | <b>10</b>         | <b>1 (10%)</b>  |           |     |     |     |
| Blood              | 10                | 1 (10%)         |           |     |     |     |
| Active lesion      | 0                 | 0 (0%)          |           |     |     |     |
| Crust              | 0                 | 0 (0%)          |           |     |     |     |
| <b>Day 14</b>      |                   |                 |           |     |     |     |
| <b>Overall</b>     | <b>8</b>          | <b>1 (13%)</b>  |           |     |     |     |
| Blood              | 8                 | 1 (13%)         |           |     |     |     |
| Active lesion      | 1                 | 1 (100%)        |           |     |     |     |
| Crust              | 1                 | 1 (100%)        |           |     |     |     |
| <b>Day 21</b>      |                   |                 |           |     |     |     |
| <b>Overall</b>     | <b>2</b>          | <b>1 (50%)</b>  |           |     |     |     |
| Blood              | 2                 | 1 (50%)         |           |     |     |     |
| Active lesion      | 0                 | 0 (0%)          |           |     |     |     |
| Crust              | 1                 | 1 (100%)        |           |     |     |     |
| <b>Final visit</b> |                   |                 |           |     |     |     |
| <b>Overall</b>     | <b>13</b>         | <b>1 (8%)</b>   |           |     |     |     |
| Blood              | 13                | 1 (8%)          |           |     |     |     |
| Active lesion      | 1                 | 1 (100%)        |           |     |     |     |
| Crust              | 0                 | 0 (0%)          |           |     |     |     |

Fig S4 – CT values of six patients from baseline to D4

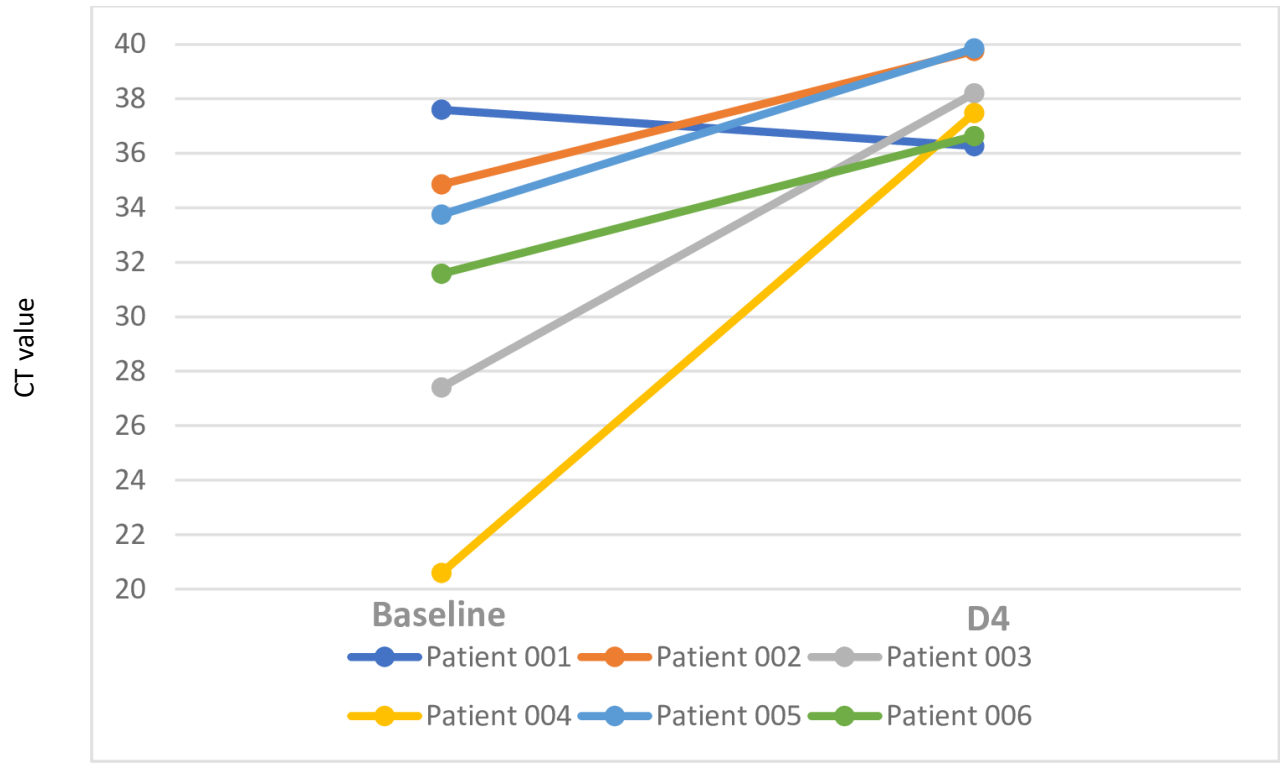

Supplement: Supplementary file [file media-1.pdf]
